# Supplementary material
Source: Springer Nature journal article supplement (https://www.springermedizin.de/resource/supplementary/13002_2009_147_MOESM2_ESM.pdf/9627256)
Supplement: MOESM2 [file 9627256]

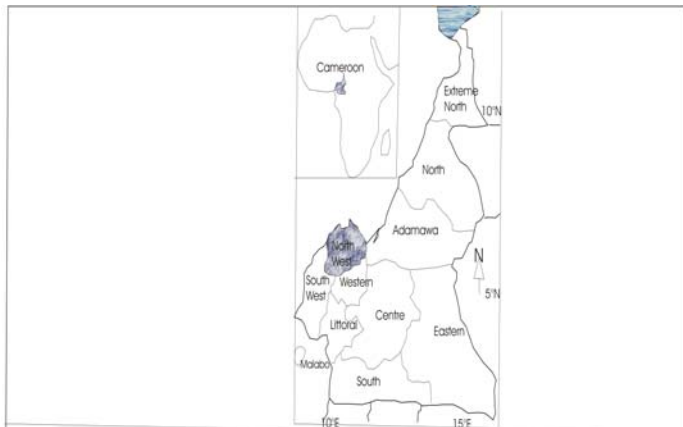

BOYO DIVISION IN THE NORTH WEST PROVINCE OF CAMAEROON

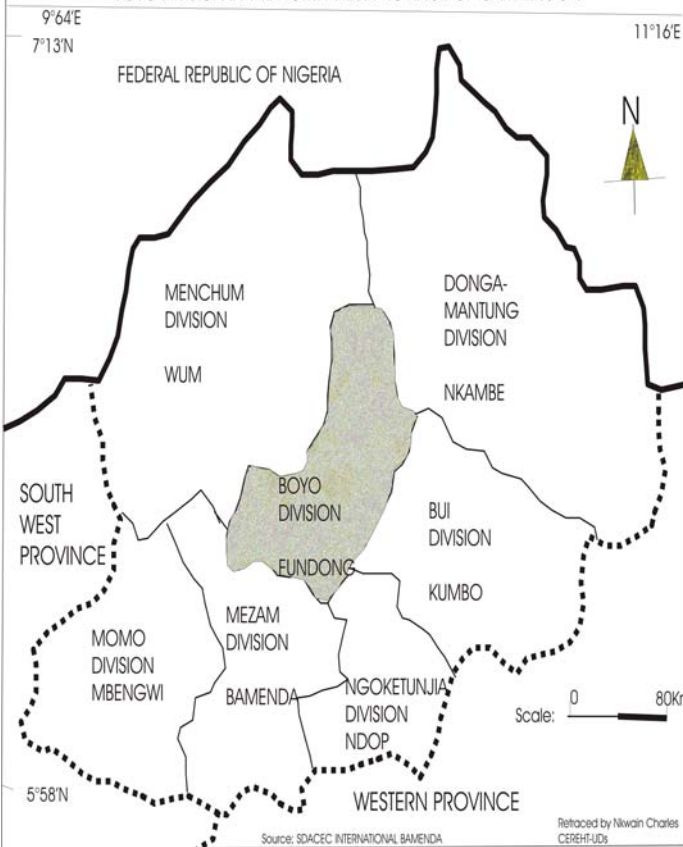

Source: SDACEC INTERNATIONAL BAMBENDA

Retraced by Niwain Charles CEREH-UDS

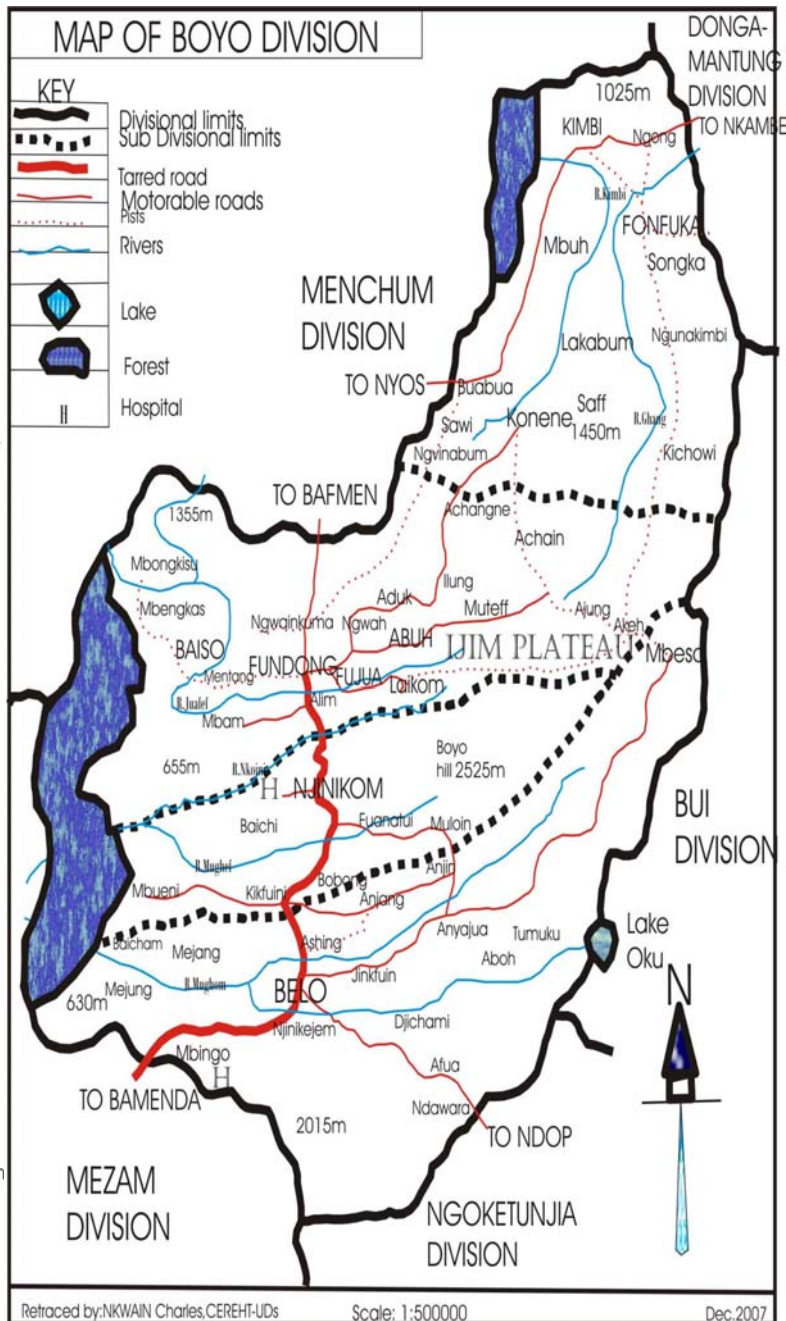

Retraced by: NKWAIN Charles, CEREH-UDS

Scale: 1:50000

Dec. 2007
